# Supplementary figures and images for: Azorean Black Tea (Camellia sinensis) Antidermatophytic and Fungicidal Properties
Source: MDPI journal article supplement (doi:10.3390/molecules28237775), 2023-11-25

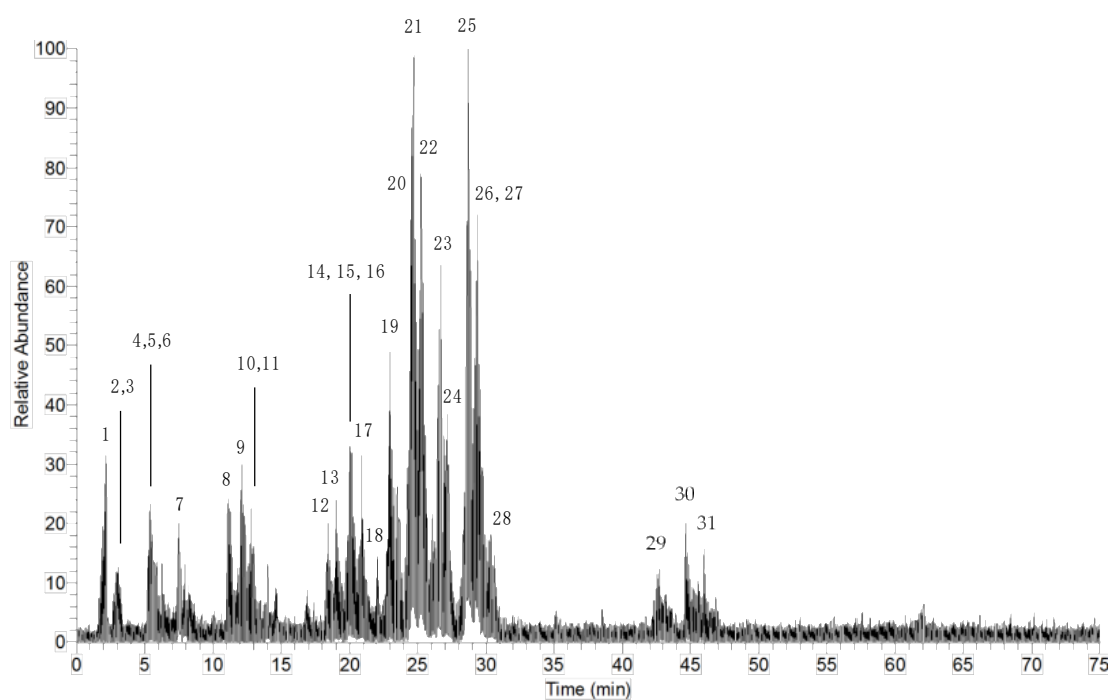

**Figure S1.** Total ion current chromatogram of ABT. Peaks 1–31 are listed in Table 1.

Supplement: s1 [file s1]
